# Supplementary material for: Genetic and environmental influences on conduct and antisocial personality problems in childhood, adolescence, and adulthood
Source: Springer Nature journal article supplement (doi:10.1007/s00787-017-1014-y), 2017-06-21
Supplement: MOESM1 [file 12461256]

## Supplementary material

Table 1. The list of items included in the sum score of conduct problems as measured in the Child Behavior Checklist (CBCL) and Youth Self-Report (YSR) and of antisocial personality problems as measured in the Adult Self-Report (ASR).

| CBCL and YSR                                 | ASR                                                             |
|----------------------------------------------|-----------------------------------------------------------------|
| Mean to others                               | I am mean to others                                             |
| Damage or destroy things belonging to others | I damage or destroy things belonging to others                  |
| Lacks guilt                                  | I get along badly with my family                                |
| Gets in fights                               | I get in many fights                                            |
| Hang around people who get in trouble        | I hang around people who get in trouble                         |
| Lies/cheats                                  | I lie or cheat                                                  |
| Physically attacks people                    | I physically attack people                                      |
| Leaves home                                  | My behavior is irresponsible                                    |
| Sets fire                                    | I do things that may cause me trouble with the law              |
| Stealing from home                           | I steal                                                         |
| Stealing outside home                        | I argue a lot                                                   |
| Swearing                                     | I have a hot temper                                             |
| Threatens to hurt people                     | I threaten to hurt people                                       |
| Truant                                       | I fail to pay my debts or meet other financial responsibilities |
| Breaks rules**                               | I break rules at work or elsewhere                              |
| Vandalism*                                   |                                                                 |
| Cruel to animals*                            |                                                                 |

\*only CBCL \*\* only YSR
